# Supplementary material for: Autophosphorylation of the Tousled-like kinases TLK1 and TLK2 regulates recruitment to damaged chromatin via PCNA interaction
Source: PubMed Central journal article supplement — bioRxiv. 2024 Apr 26:2024.04.22.590659. Preprint. [Version 1] doi: 10.1101/2024.04.22.590659 (PMC11071368; doi:10.1101/2024.04.22.590659), 2024-04-26

**A**

| Identified Protein | Spectral Counts | Identified Protein | Spectral Counts |
|--------------------|-----------------|--------------------|-----------------|
| TLK1 (Bait)        | 645             | TLK2 (Bait)        | 1296            |
| TLK2               | 194             | TLK1               | 251             |
| PGAM5              | 26              | TUBB               | 114             |
| HSPA1B             | 22              | HSPA8              | 91              |
| HSPA8              | 20              | HSPA1B             | 48              |
| HSPA5              | 16              | HSPA5              | 43              |
| LC8                | 15              | LC8                | 41              |
| HNRNPM             | 14              | ACACA              | 30              |
| RPL11              | 14              | MCCC2              | 29              |
| ACACA              | 12              | HNRNPM             | 23              |

**B**

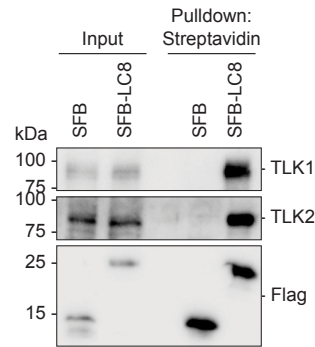

**C**

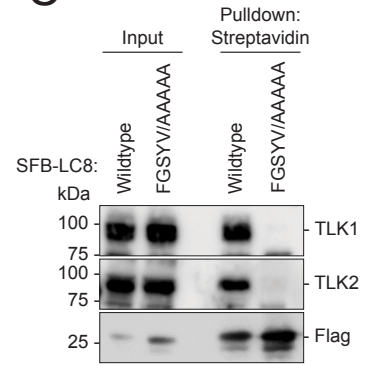

**D**

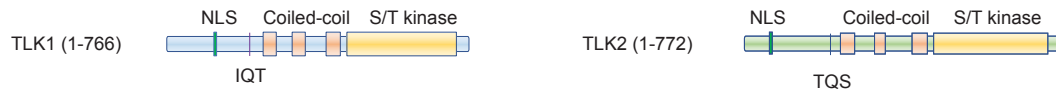

**E**

|          | Putative LC8-binding motif |                  |                 |     |
|----------|----------------------------|------------------|-----------------|-----|
|          | Sequence                   | Position         | Residue         |     |
| TLK1     | Homo                       | QLSFKI IQ DLTMLR | 220             |     |
|          | Mus                        | QLSFKITQ DLTMLR  | 220             |     |
|          | Rattus                     | QLSFKITQ DLTMLR  | 220             |     |
|          | Sus                        | QLSFKITQ DLTMLR  | 220             |     |
|          | Felis                      | QLSFKITQ DLTMLR  | 220             |     |
|          | Bos                        | QLSFKITQ DLTMLR  | 24              |     |
|          | Pan                        | QLSFKI IQ DLTMLR | 241             |     |
|          | Gallus                     | QLSFKITQ DLTMLR  | 322             |     |
|          | Ficedula                   | QLSFKITQ DLTMLR  | 188             |     |
|          | Xenopus                    | QLSYKLVQ DLTMLR  | 176             |     |
|          | Danio                      | QLSSRSVQ DLTMLR  | 221             |     |
|          | TLK2                       | Homo             | SIQHRQTO DLTMEK | 216 |
|          |                            | Mus              | SIQHRQTO DLTMEK | 183 |
|          |                            | Rattus           | SIQHRQTO DLTMEK | 165 |
| Sus      |                            | SIQHRQTO DLTMEK  | 165             |     |
| Felis    |                            | SIQHRQTO DLTMEK  | 177             |     |
| Bos      |                            | SIQHRQTO DLTMEK  | 165             |     |
| Pan      |                            | SIQHRQTO DLTMEK  | 141             |     |
| Gallus   |                            | SIQHRQSQ DLTMEK  | 224             |     |
| Ficedula |                            | SIQHRQSQ DLTMEK  | 187             |     |
| Xenopus  |                            | SIQHRCTQ DLTMDK  | 140             |     |
| Danio    | HTQHRASQSELTMEK            | 137              |                 |     |

**F**

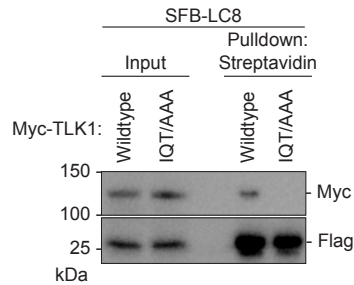

**G**

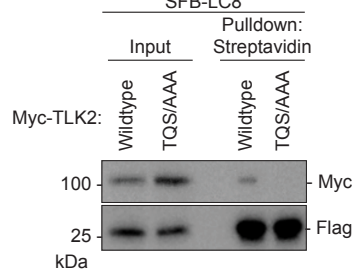

**H**

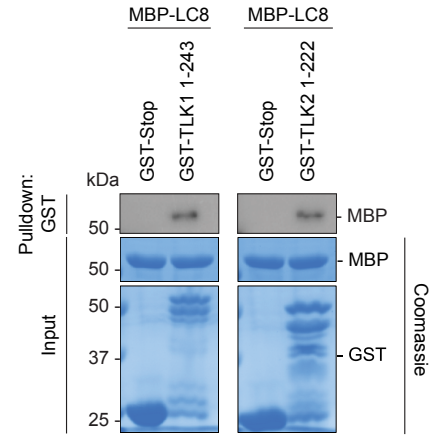

A

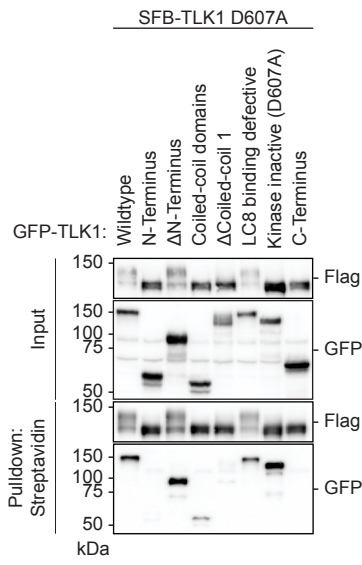

B

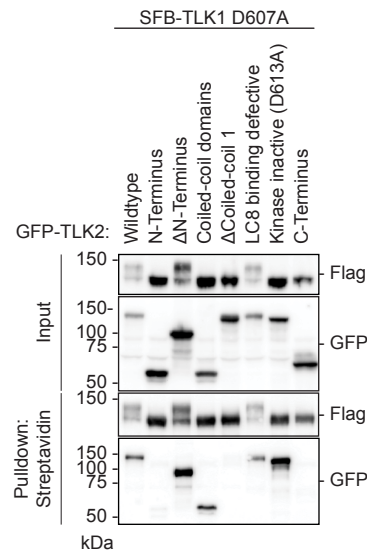

C

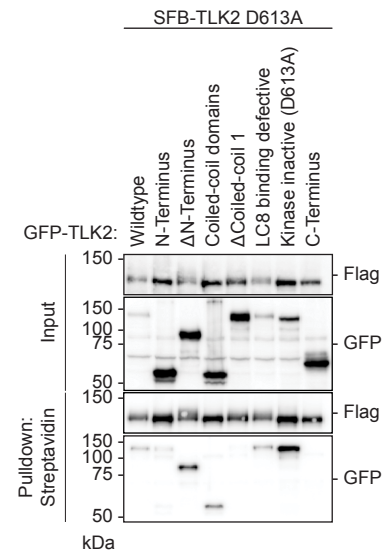

Figure S3

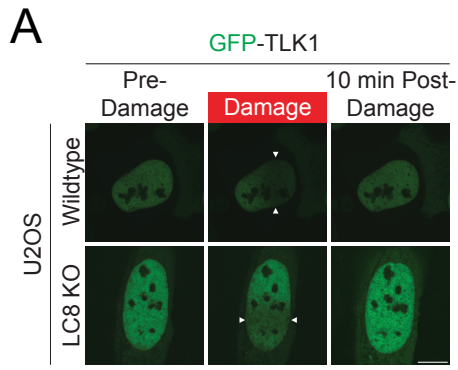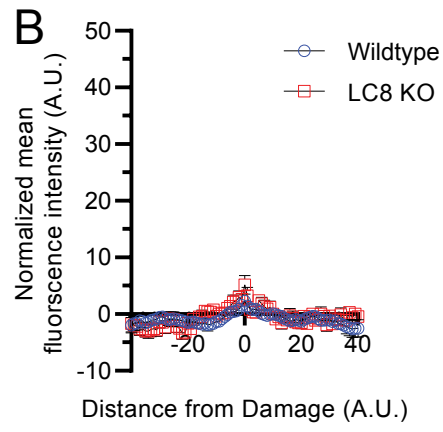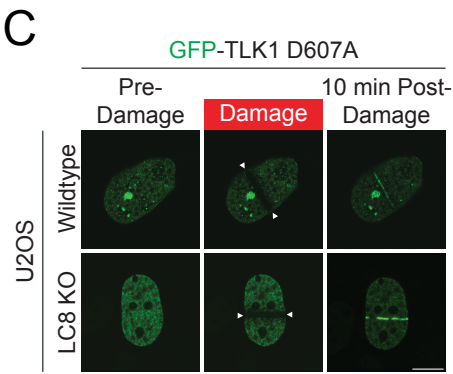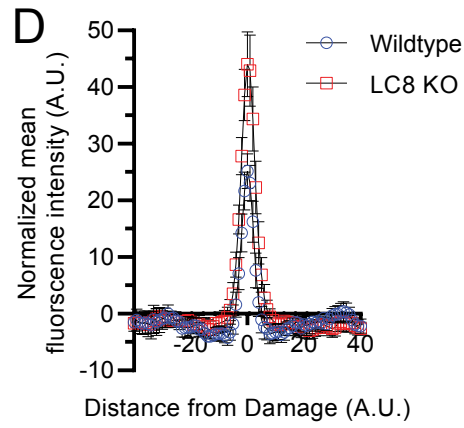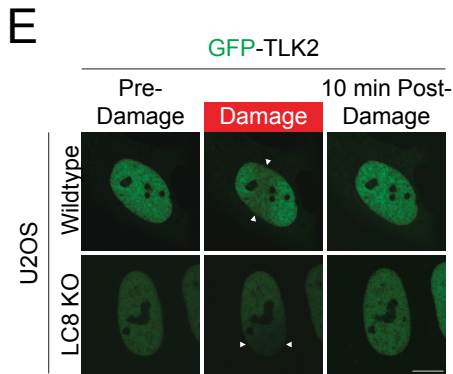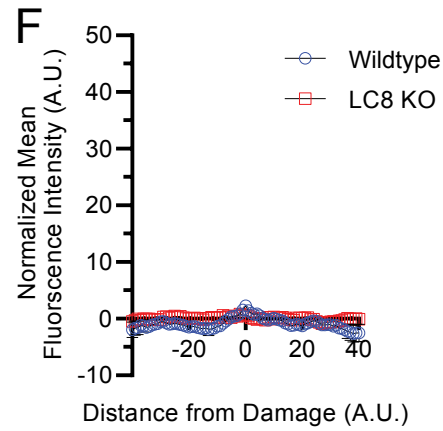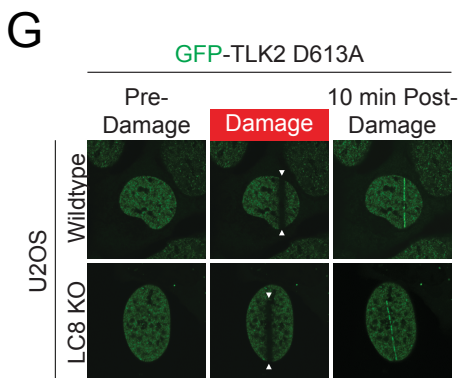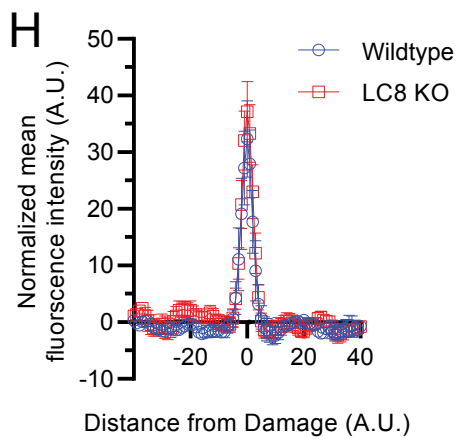

Figure S4

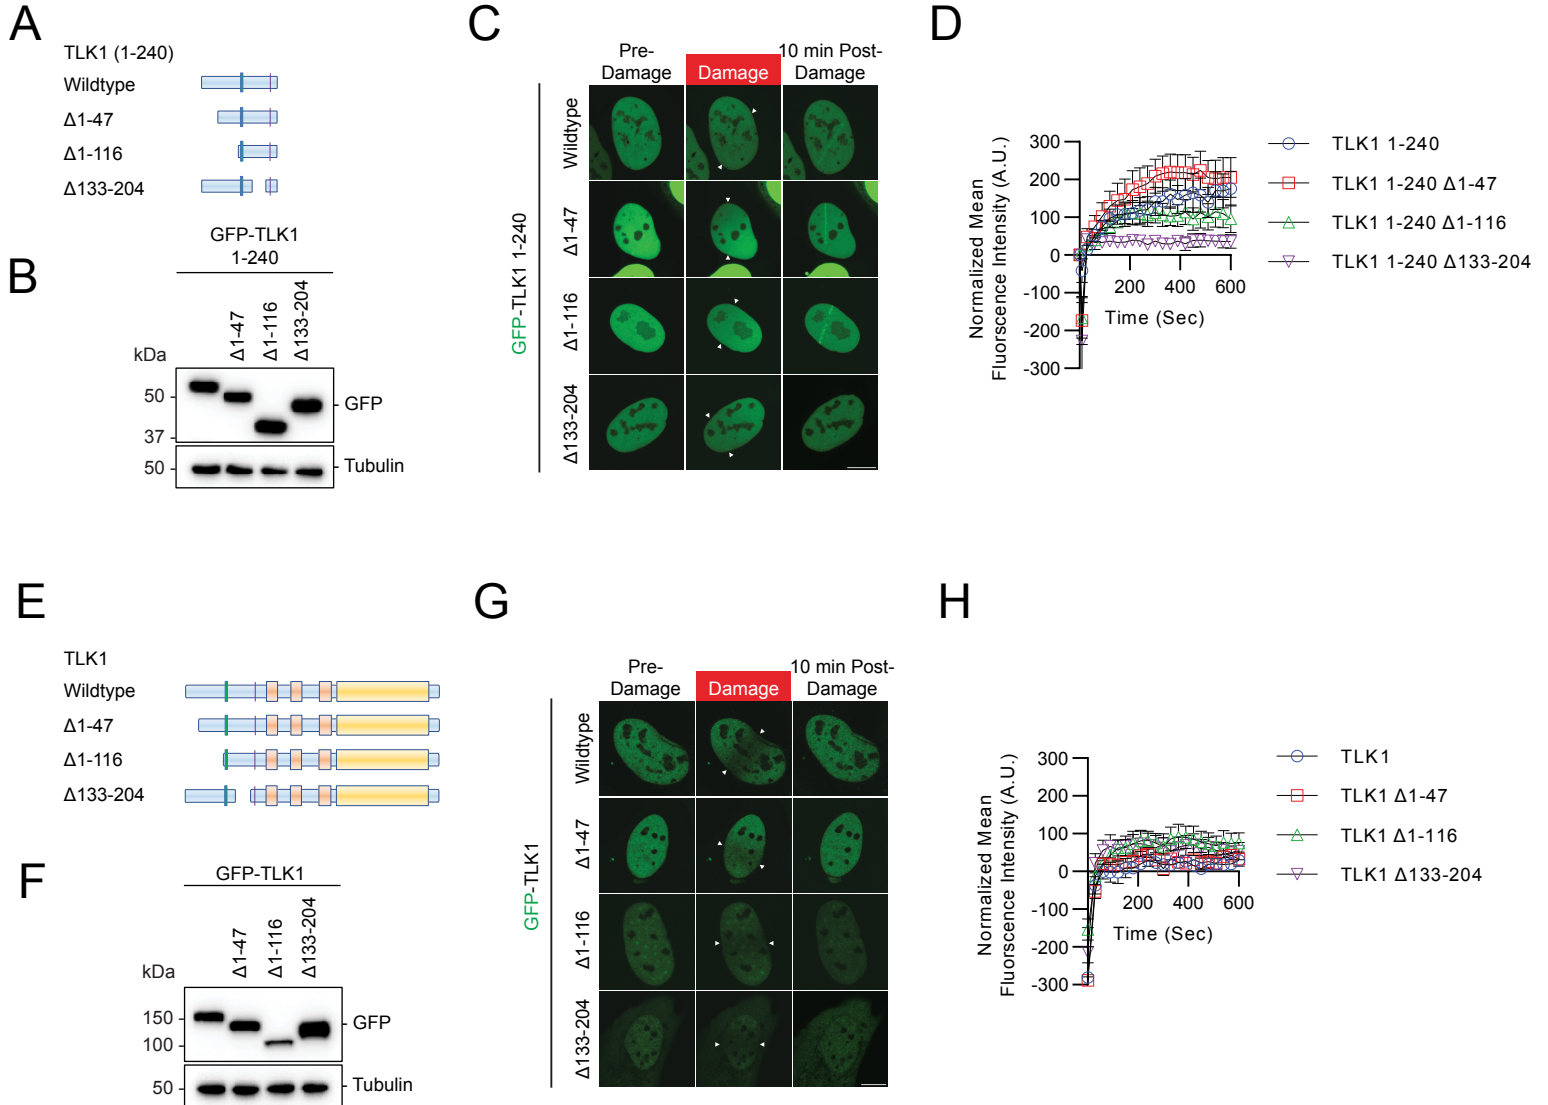

A

| Identified Protein | Spectral Counts |                          |
|--------------------|-----------------|--------------------------|
|                    | TLK1 133 - 208  | TLK1 133-208 Y149A F150A |
| TLK1 (Bait)        | 19              | 17                       |
| DSP                | 9               | N.C.                     |
| HSPA4              | 7               | 6                        |
| HSPA4L             | 7               | 7                        |
| RNH1               | 6               | 5                        |
| PCNA               | 6               | N.C.                     |

B

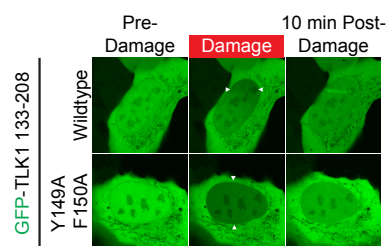

C

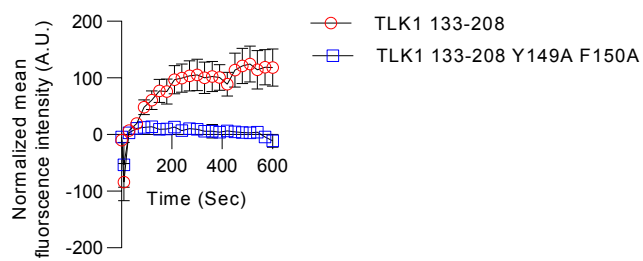

Supplement: media-1.pdf [file media-1.pdf]
